# Supplementary figures and images for: Molecular epidemiology and population structure of the honey bee brood pathogen Melissococcus plutonius
Source: PubMed Central journal article supplement — ISME J. 2014 Mar 6;8(8):1588–97. doi: 10.1038/ismej.2014.20 (PMC4817608; doi:10.1038/ismej.2014.20), 2014-03-06

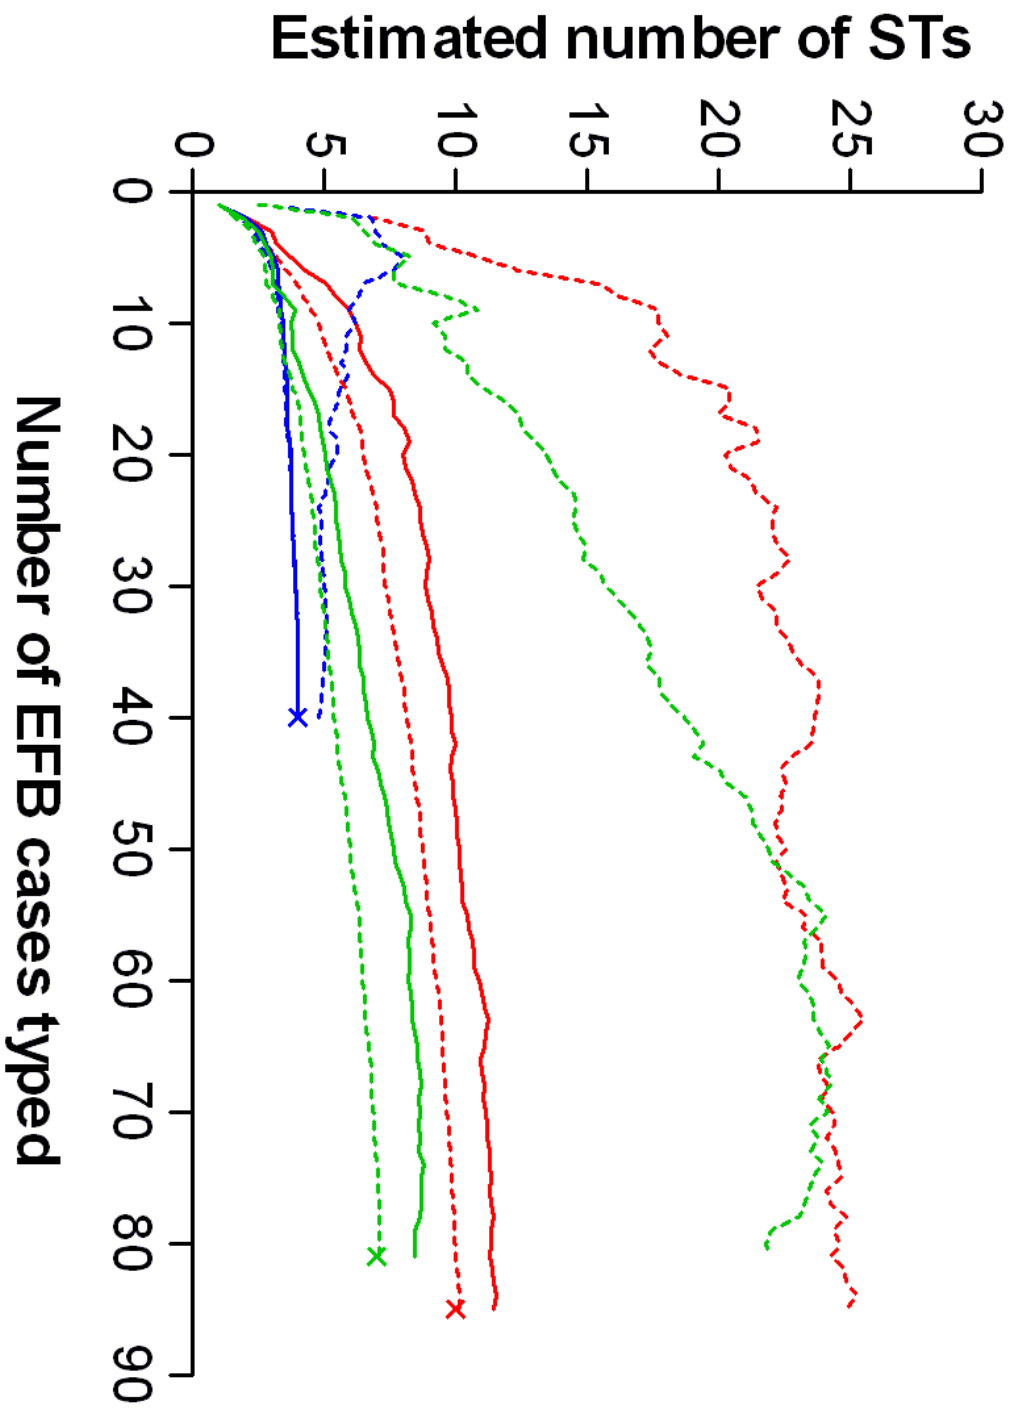

Norfolk/Suffolk

Wales

England Other

Supplement: ismej201420x1.pdf [file ismej201420x1.pdf]

Number of MLST analyses

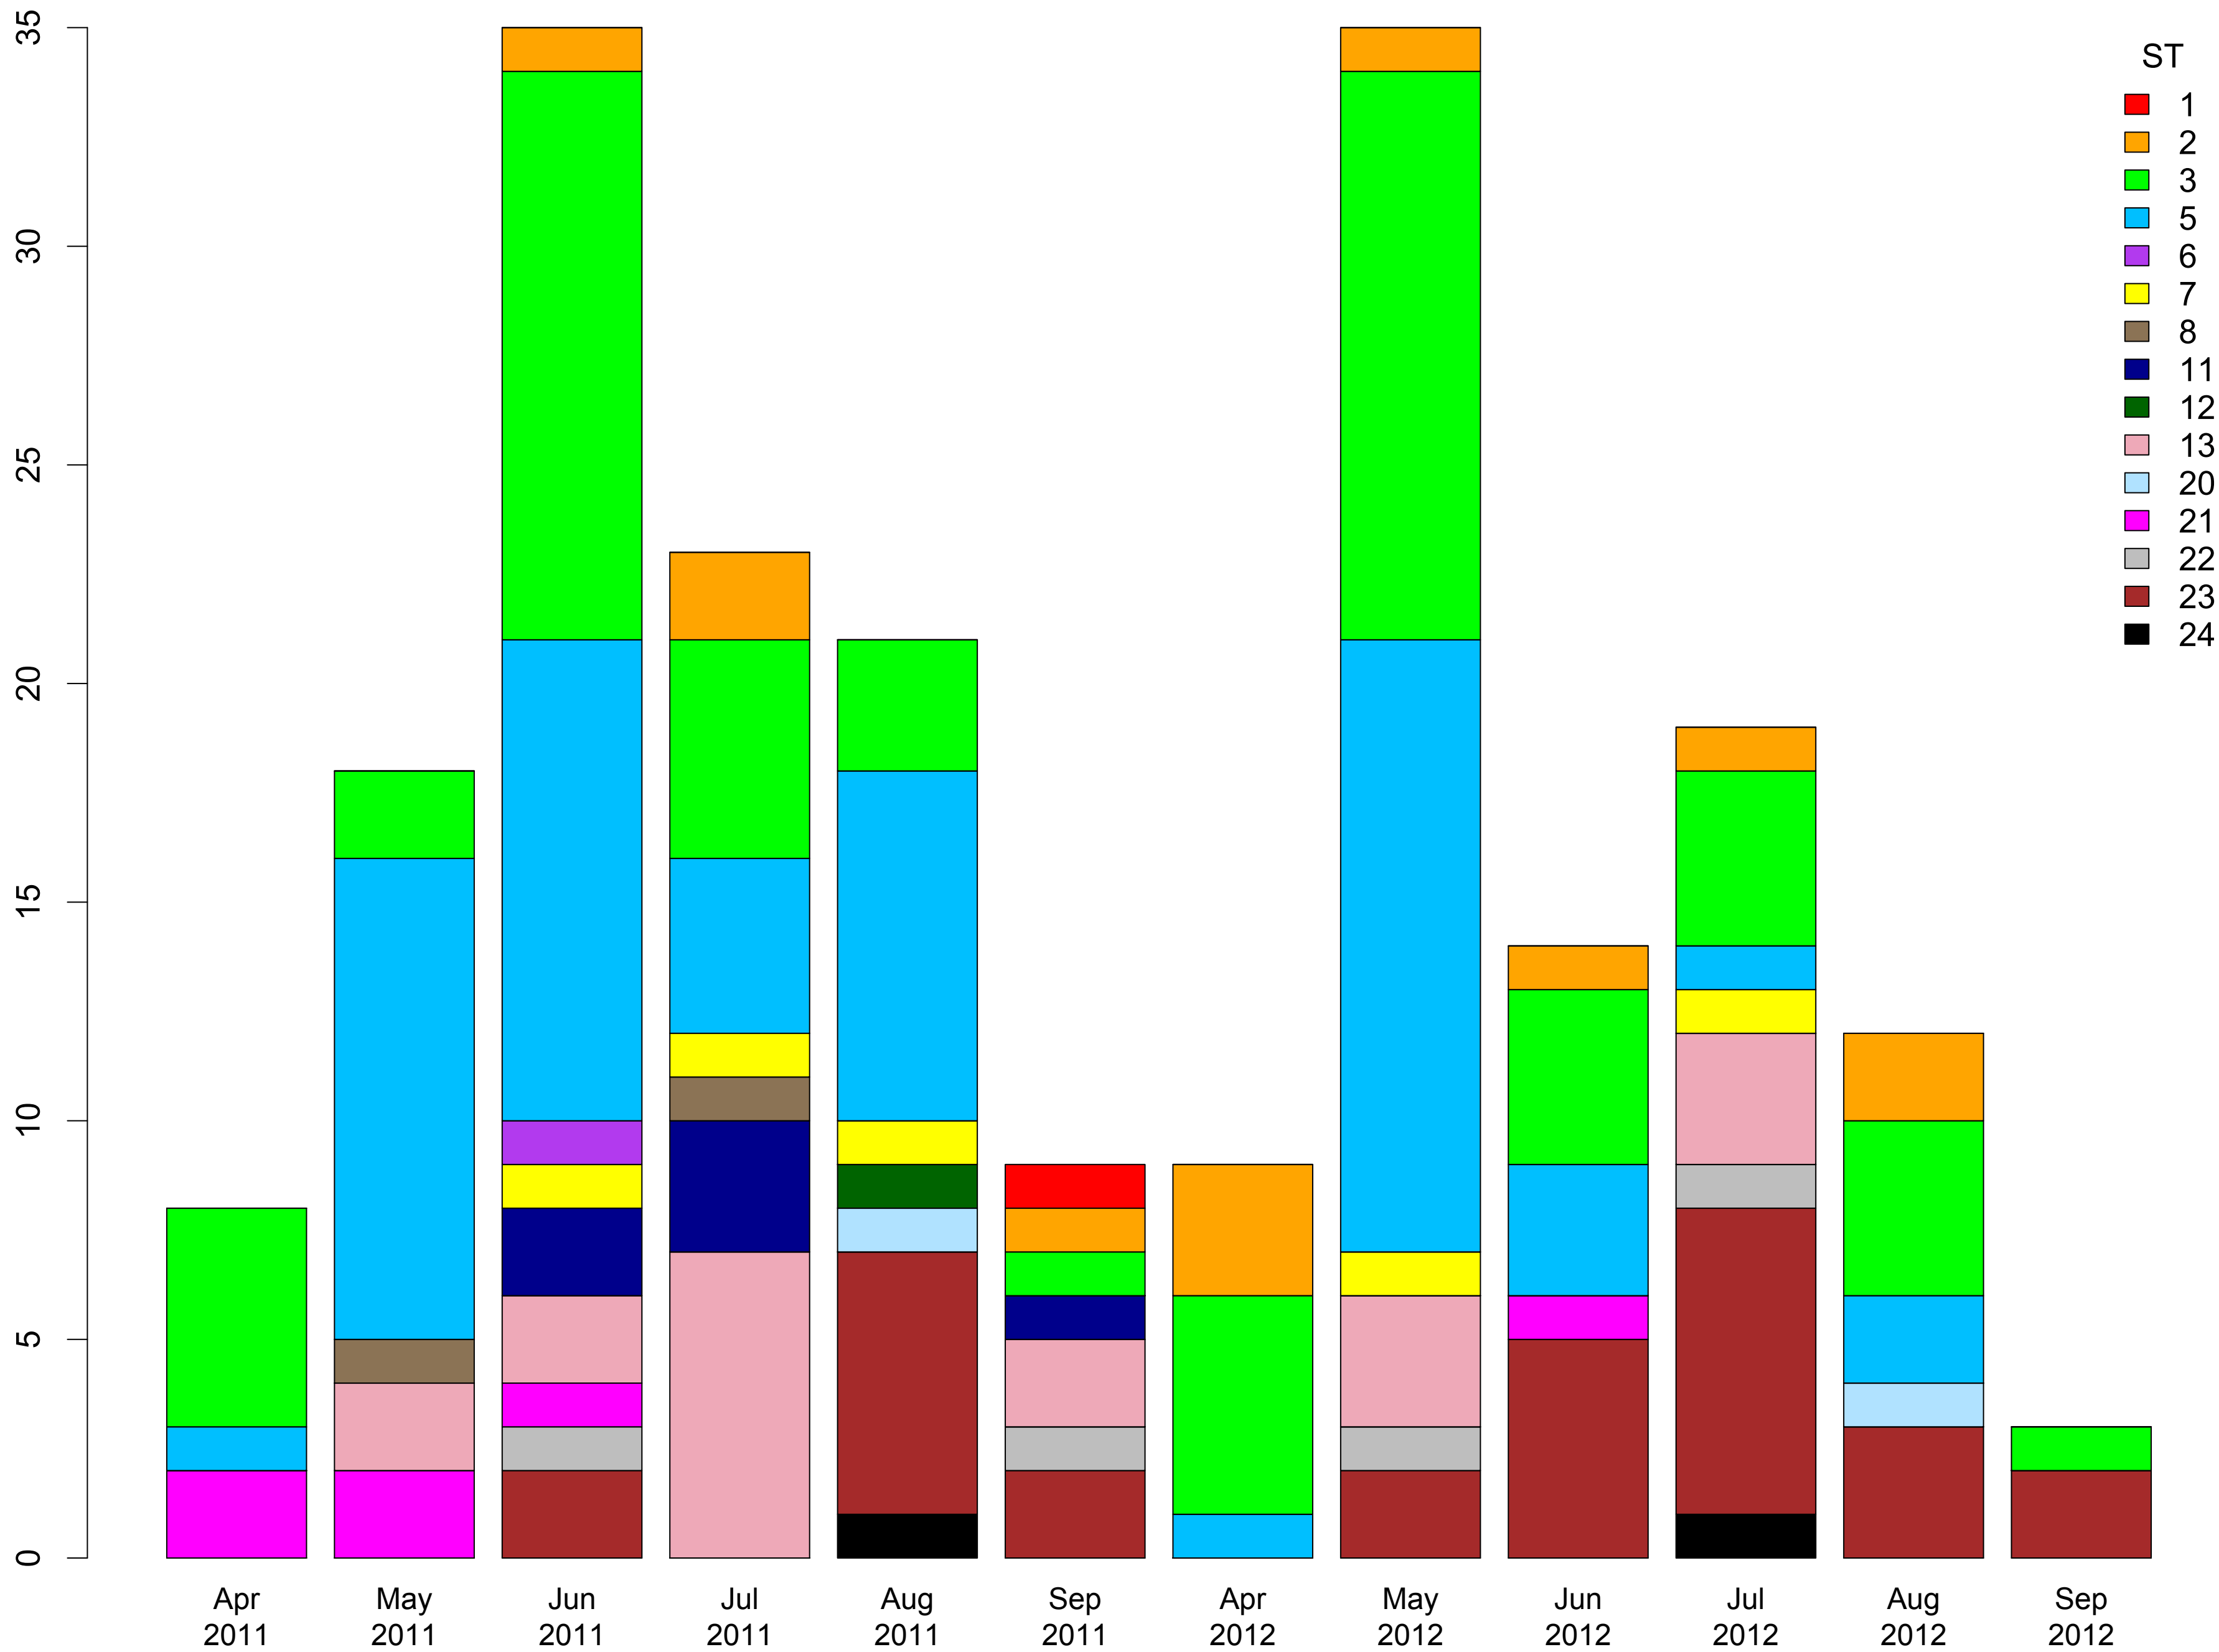

Supplement: ismej201420x2.pdf [file ismej201420x2.pdf]

**ST 2**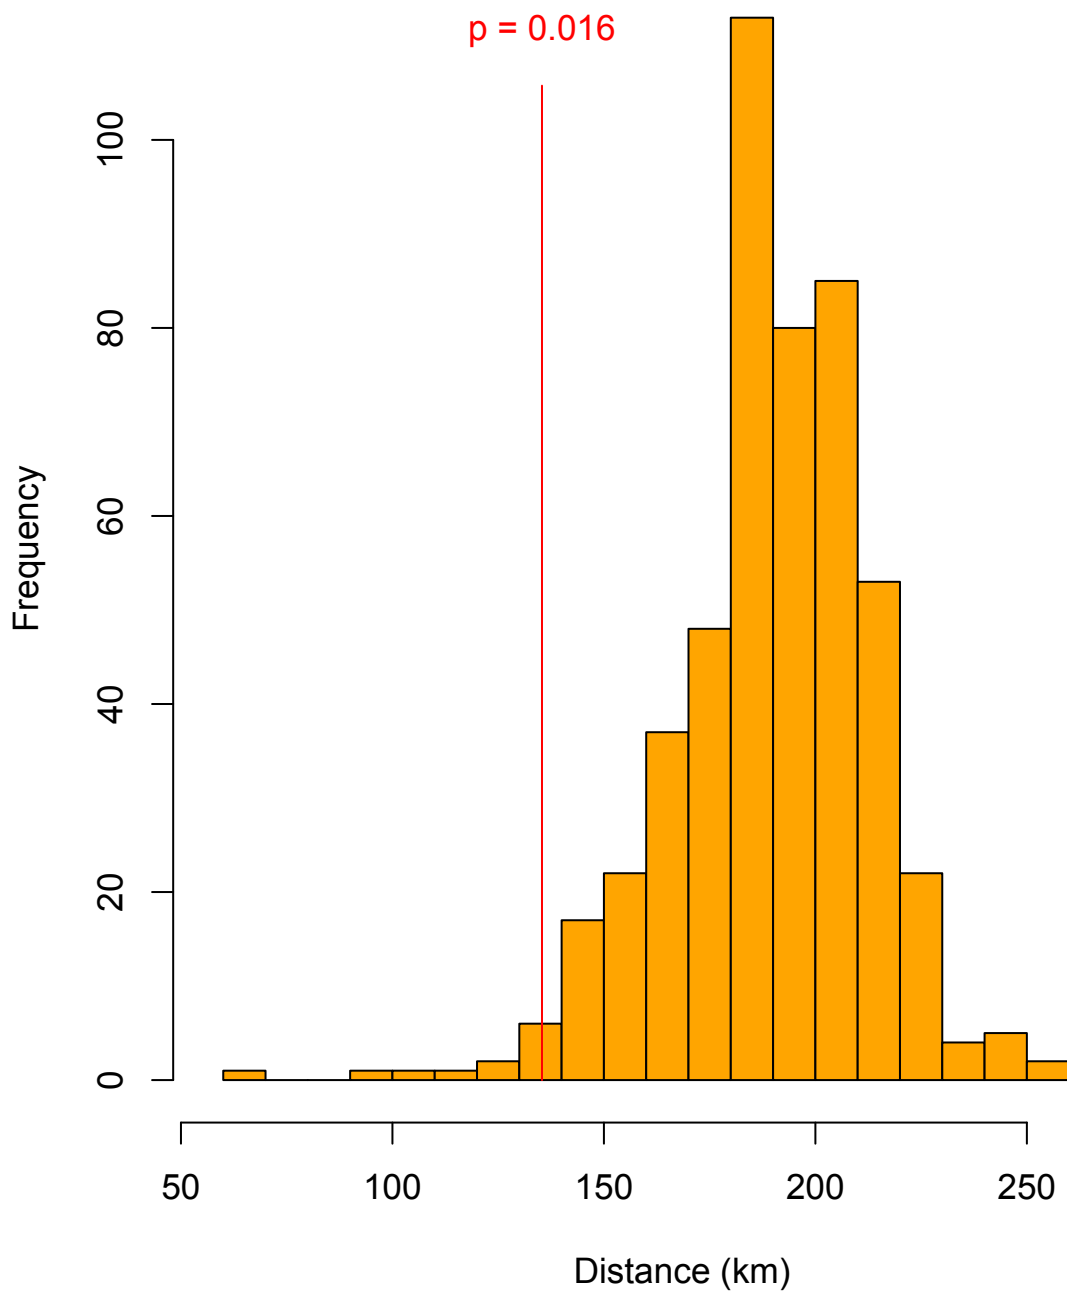**ST 3**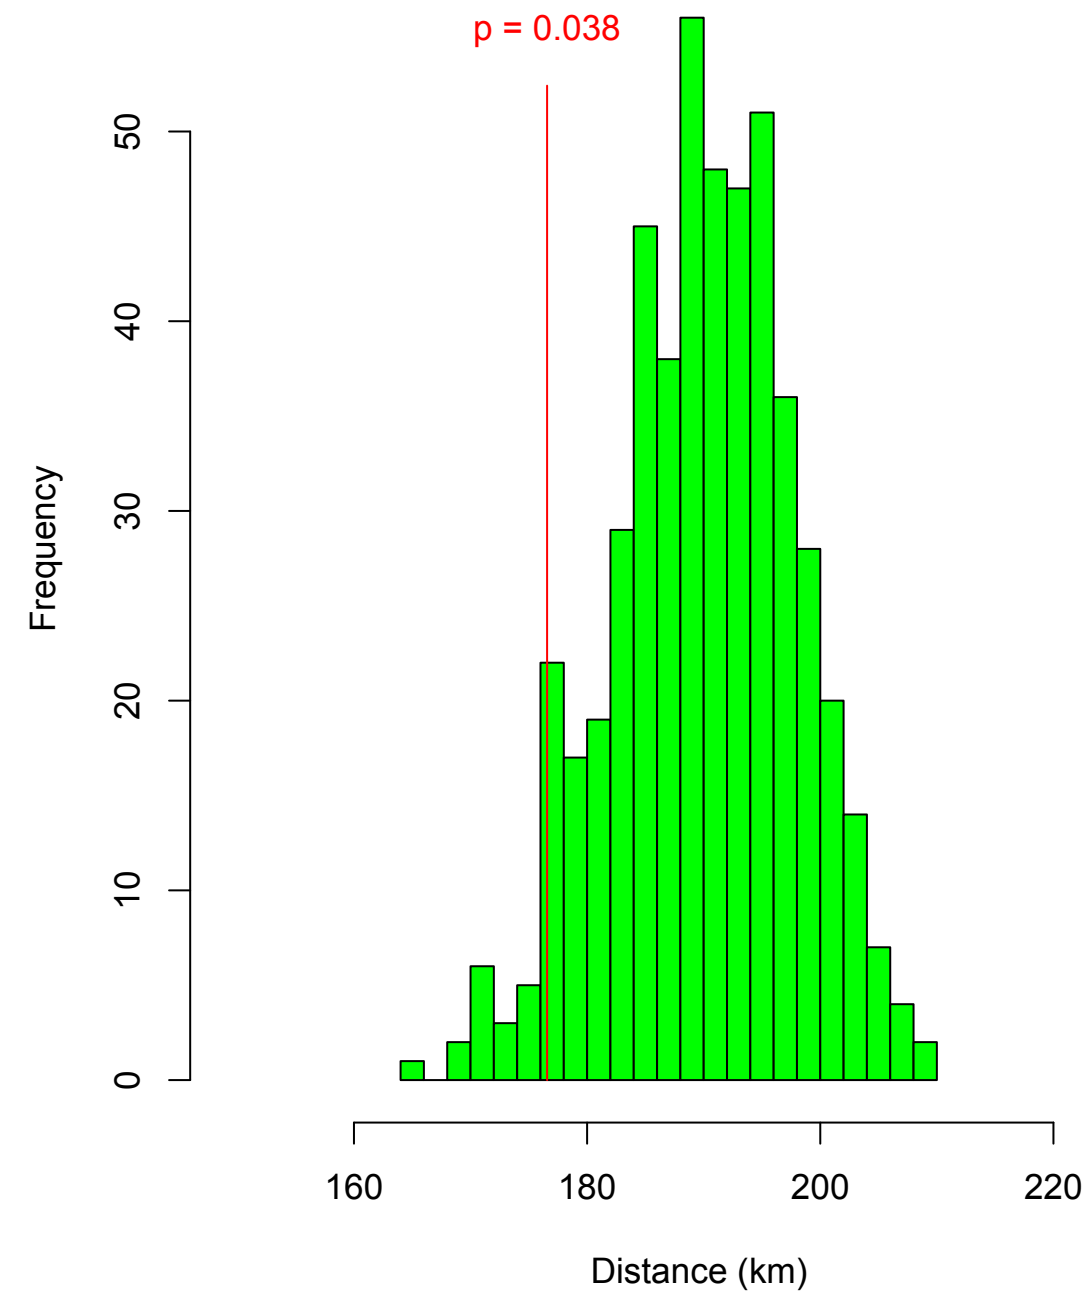**ST 5**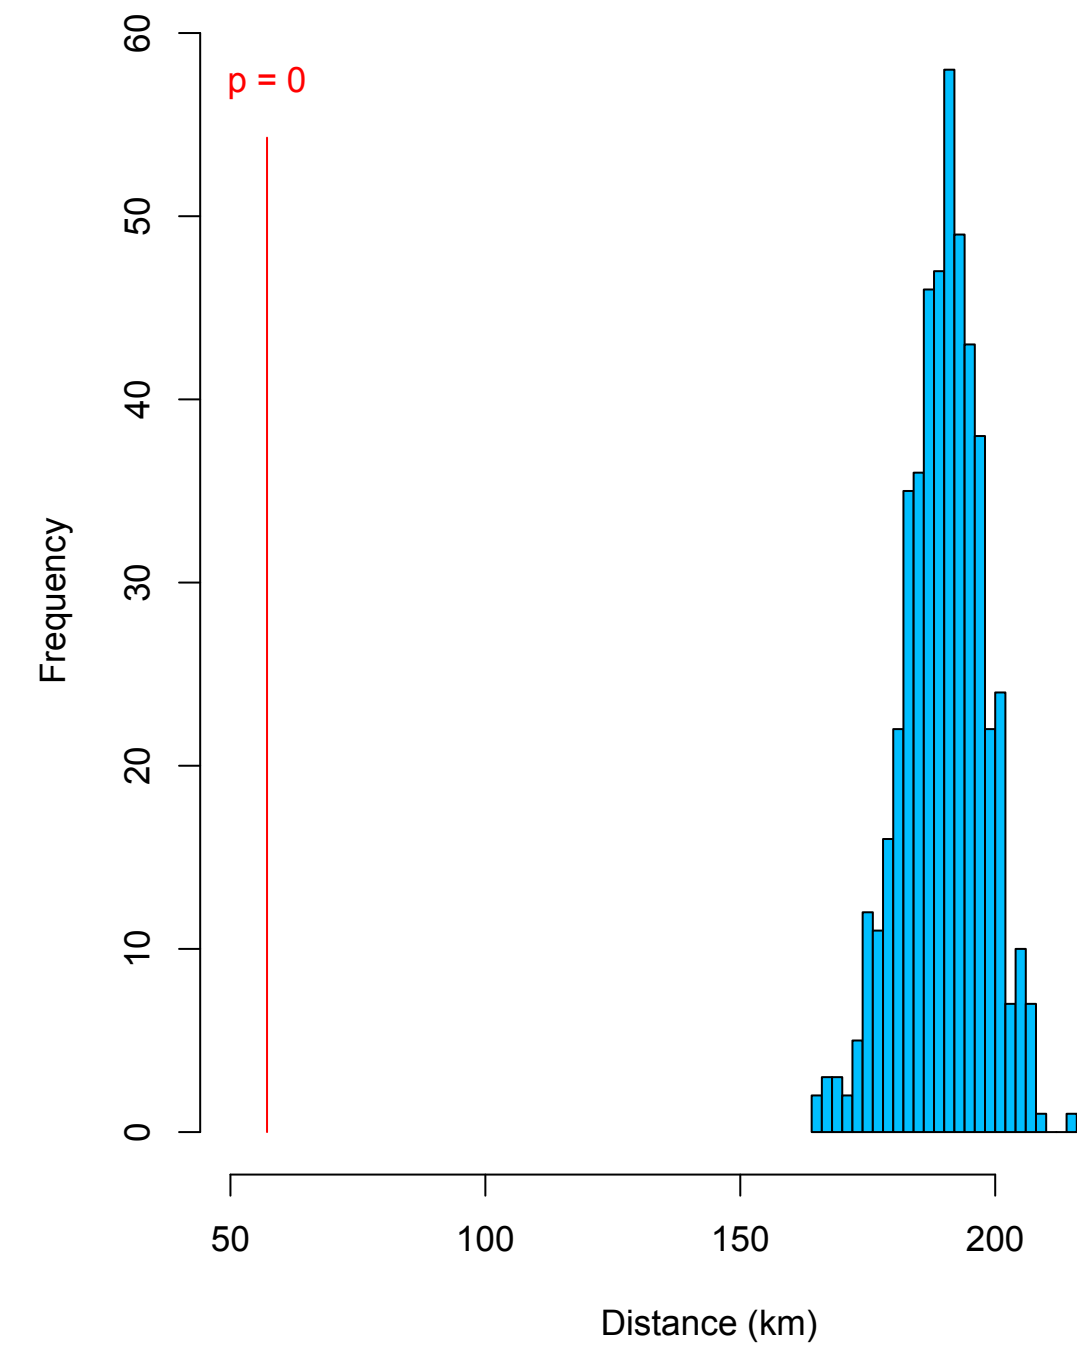**ST 13**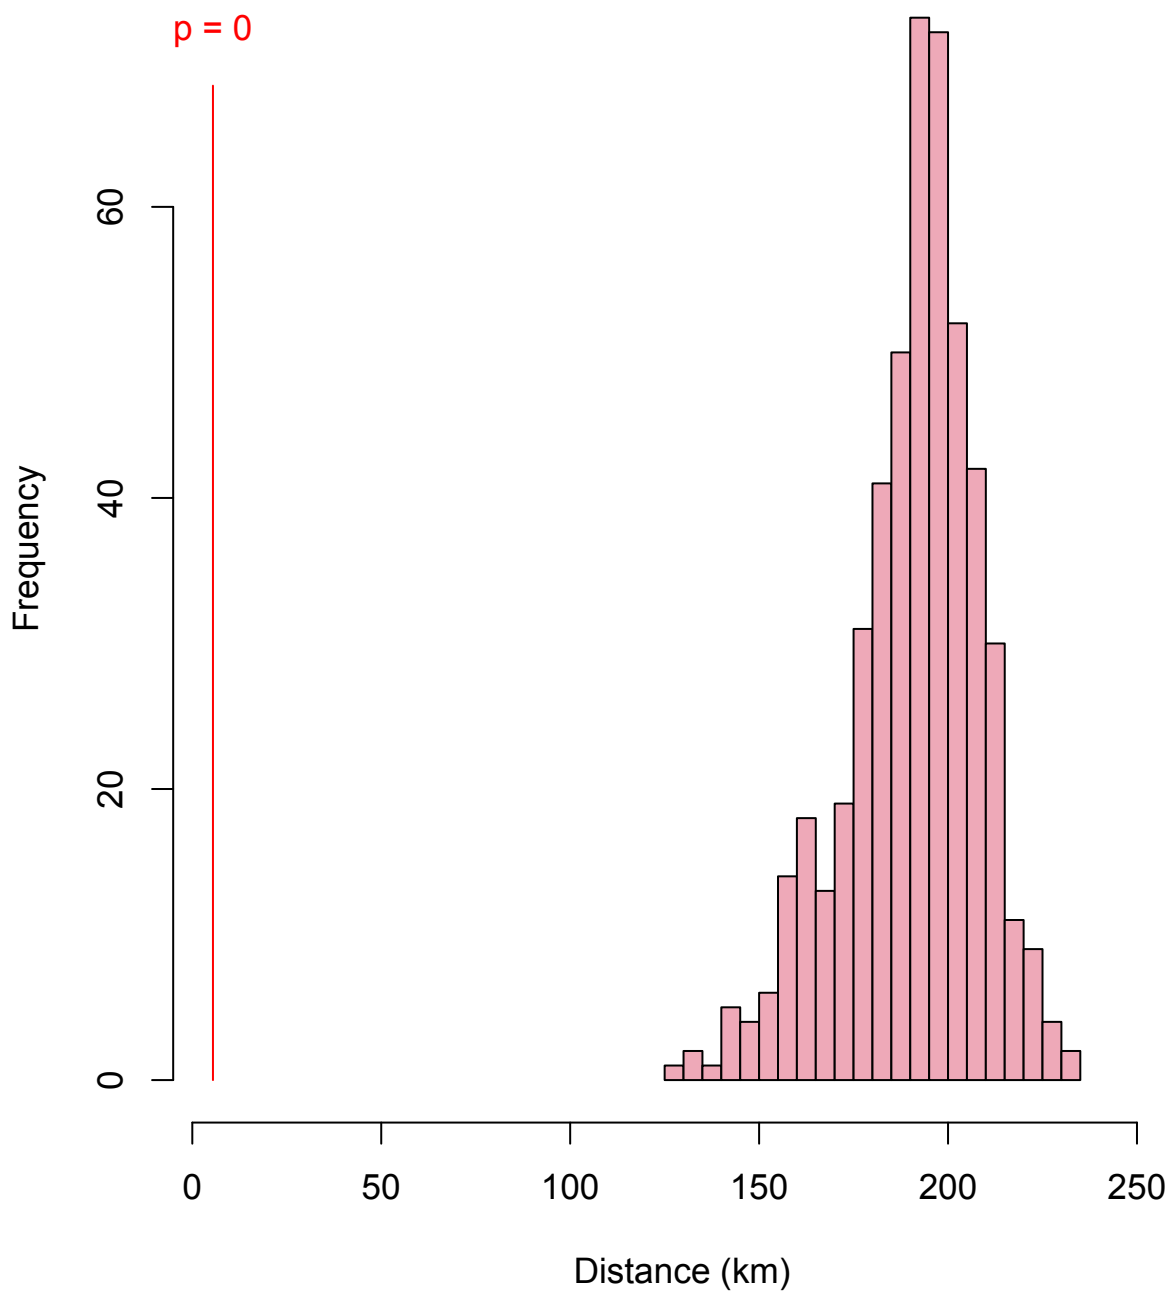**ST 23**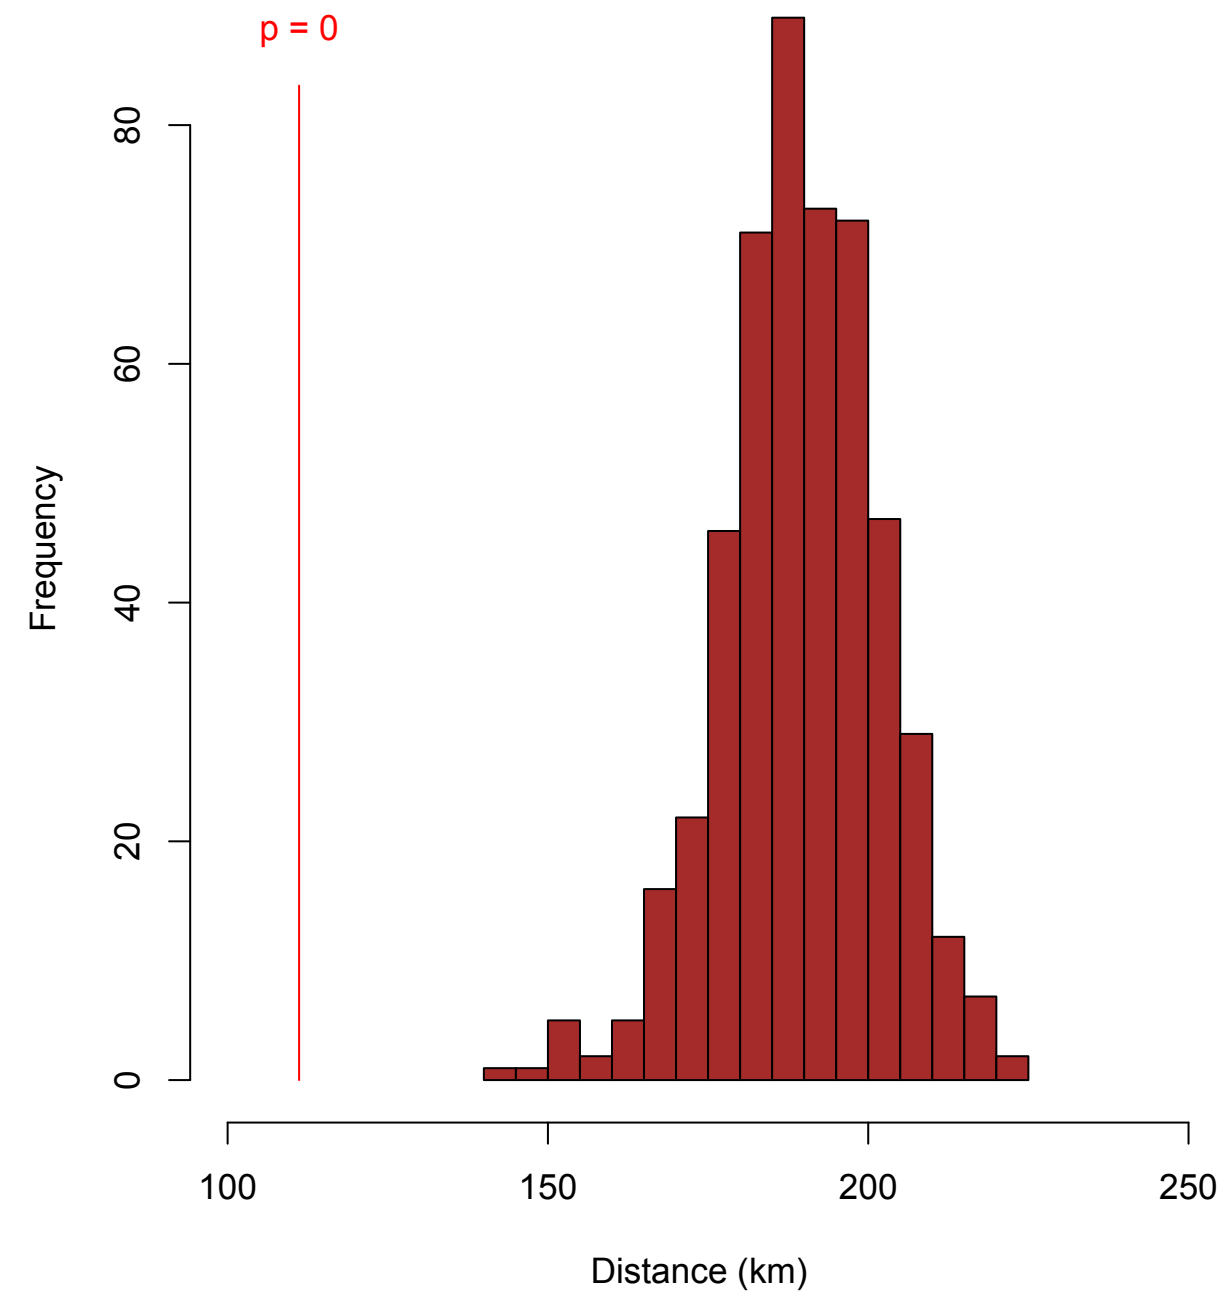

Supplement: ismej201420x3.pdf [file ismej201420x3.pdf]
